# Supplementary material
Source: Springer Nature journal article supplement (https://www.springermedizin.de/resource/supplementary/13037_2012_148_MOESM1_ESM.pdf/9659452)

# Annual number of spinal fractures related to ankylosing spondylitis

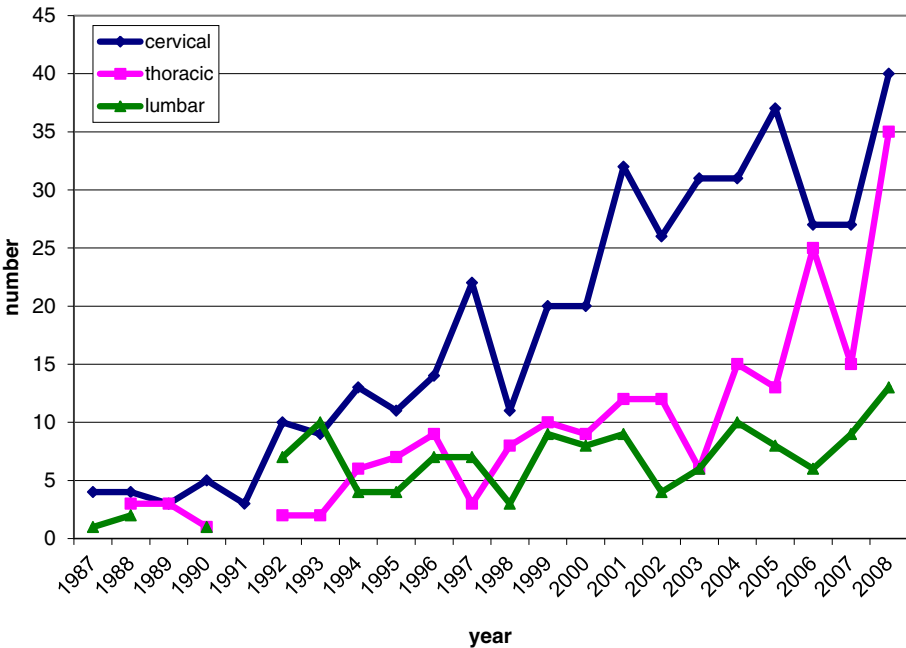

Supplement: MOESM1 [file 9659452]
